# Supplementary material
Source: HighWire-hosted journal article supplement (https://injuryprevention.bmj.com/highwire/filestream/159937/field_highwire_adjunct_files/3/ip-2023-044862supp004_data_supplement.pdf)
Supplement: ip-2023-044862supp004_data_supplement.pdf [file ip-2023-044862supp004_data_supplement.pdf]

**Supplemental File 4 - Additional California fatal drowning variables, 2005 -2019.**

|                                 | Unintentional |       | Intentional |       | Undetermined |       | All Intentions |       |
|---------------------------------|---------------|-------|-------------|-------|--------------|-------|----------------|-------|
|                                 | n             | %     | n           | %     | n            | %     | n              | %     |
| Total                           | 7,624         | 100%  | 1,152       | 100%  | 461          | 100%  | 9,237          | 100%  |
| Year of death                   |               |       |             |       |              |       |                |       |
| 2005                            | 567           | 7.4%  | 73          | 6.3%  | 27           | 5.9%  | 667            | 7.2%  |
| 2006                            | 568           | 7.5%  | 75          | 6.5%  | 38           | 8.2%  | 681            | 7.4%  |
| 2007                            | 481           | 6.3%  | 52          | 4.5%  | 22           | 4.8%  | 555            | 6%    |
| 2008                            | 475           | 6.2%  | 59          | 5.1%  | 27           | 5.9%  | 561            | 6.1%  |
| 2009                            | 517           | 6.8%  | 59          | 5.1%  | 28           | 6.1%  | 604            | 6.5%  |
| 2010                            | 502           | 6.6%  | 66          | 5.7%  | 28           | 6.1%  | 596            | 6.5%  |
| 2011                            | 453           | 5.9%  | 60          | 5.2%  | 38           | 8.2%  | 551            | 6%    |
| 2012                            | 456           | 6%    | 65          | 5.6%  | 33           | 7.2%  | 554            | 6%    |
| 2013                            | 494           | 6.5%  | 78          | 6.8%  | 38           | 8.2%  | 610            | 6.6%  |
| 2014                            | 487           | 6.4%  | 73          | 6.3%  | 15           | 3.3%  | 575            | 6.2%  |
| 2015                            | 468           | 6.1%  | 91          | 7.9%  | 28           | 6.1%  | 587            | 6.4%  |
| 2016                            | 515           | 6.8%  | 96          | 8.3%  | 38           | 8.2%  | 649            | 7%    |
| 2017                            | 559           | 7.3%  | 93          | 8.1%  | 34           | 7.4%  | 686            | 7.4%  |
| 2018                            | 544           | 7.1%  | 101         | 8.8%  | 37           | 8%    | 682            | 7.4%  |
| 2019                            | 538           | 7.1%  | 111         | 9.6%  | 30           | 6.5%  | 679            | 7.4%  |
| Month of Death                  |               |       |             |       |              |       |                |       |
| Jan                             | 460           | 6%    | 96          | 8.3%  | 39           | 8.5%  | 595            | 6.4%  |
| Feb                             | 409           | 5.4%  | 97          | 8.4%  | 34           | 7.4%  | 540            | 5.8%  |
| Mar                             | 514           | 6.7%  | 107         | 9.3%  | 38           | 8.2%  | 659            | 7.1%  |
| Apr                             | 569           | 7.5%  | 86          | 7.5%  | 41           | 8.9%  | 696            | 7.5%  |
| May                             | 676           | 8.9%  | 113         | 9.8%  | 41           | 8.9%  | 830            | 9%    |
| Jun                             | 985           | 12.9% | 101         | 8.8%  | 40           | 8.7%  | 1,126          | 12.2% |
| Jul                             | 1,221         | 16%   | 90          | 7.8%  | 53           | 11.5% | 1,364          | 14.8% |
| Aug                             | 889           | 11.7% | 99          | 8.6%  | 41           | 8.9%  | 1,029          | 11.1% |
| Sep                             | 626           | 8.2%  | 107         | 9.3%  | 43           | 9.3%  | 776            | 8.4%  |
| Oct                             | 466           | 6.1%  | 99          | 8.6%  | 33           | 7.2%  | 598            | 6.5%  |
| Nov                             | 412           | 5.4%  | 82          | 7.1%  | 27           | 5.9%  | 521            | 5.6%  |
| Dec                             | 397           | 5.2%  | 75          | 6.5%  | 31           | 6.7%  | 503            | 5.4%  |
| Highest education               |               |       |             |       |              |       |                |       |
| Did not attend school           | 973           | 12.8% | 53          | 4.6%  | 33           | 7.2%  | 1,059          | 11.5% |
| 1st - 6th grade                 | 576           | 7.6%  | 26          | 2.3%  | 23           | 5%    | 625            | 6.8%  |
| 7th - 12th grade, no HS diploma | 964           | 12.6% | 68          | 5.9%  | 61           | 13.2% | 1,093          | 11.8% |
| High School                     | 1,981         | 26%   | 320         | 27.8% | 126          | 27.3% | 2,427          | 26.3% |
| Some College                    | 1,161         | 15.2% | 245         | 21.3% | 91           | 19.7% | 1,497          | 16.2% |
| Associate & Bachelor            | 1,185         | 15.5% | 293         | 25.4% | 65           | 14.1% | 1,543          | 16.7% |
| Doctorate & Master's            | 477           | 6.3%  | 89          | 7.7%  | 20           | 4.3%  | 586            | 6.3%  |

|                                         |       |       |     |       |     |       |       |       |
|-----------------------------------------|-------|-------|-----|-------|-----|-------|-------|-------|
| Professional                            | 76    | 1%    | **  |       | *   |       | 104   | 1.1%  |
| Unknown                                 | 231   | 3%    | **  |       | **  |       | 303   | 3.3%  |
| Marital Status                          |       |       |     |       |     |       |       |       |
| Single                                  | 3,732 | 49%   | 584 | 50.7% | 241 | 52.3% | 4,557 | 49.3% |
| Married / Domestic Partnership          | 2,234 | 29.3% | 312 | 27.1% | 93  | 20.2% | 2,639 | 28.6% |
| Divorced                                | 1,042 | 13.7% | 173 | 15%   | 83  | 18%   | 1,298 | 14.1% |
| Widowed / Surviving Partner             | 450   | 5.9%  | 57  | 4.9%  | 22  | 4.8%  | 529   | 5.7%  |
| Unknown                                 | 166   | 2.2%  | 26  | 2.3%  | 22  | 4.8%  | 214   | 2.3%  |
| Region of residence at time of death    |       |       |     |       |     |       |       |       |
| North Coast                             | 335   | 4.4%  | 51  | 4.4%  | 15  | 3.3%  | 401   | 4.3%  |
| Superior California                     | 881   | 11.6% | 93  | 8.1%  | 93  | 20.2% | 1,067 | 11.6% |
| San Francisco Bay Area                  | 1,107 | 14.5% | 344 | 29.9% | 140 | 30.4% | 1,591 | 17.2% |
| Central Coast                           | 455   | 6%    | 79  | 6.9%  | 22  | 4.8%  | 556   | 6%    |
| N. San Joaquin Valley                   | 624   | 8.2%  | 42  | 3.6%  | 17  | 3.7%  | 683   | 7.4%  |
| S. San Joaquin Valley                   | 589   | 7.7%  | 41  | 3.6%  | 21  | 4.6%  | 651   | 7%    |
| Los Angeles                             | 1,189 | 15.6% | 130 | 11.3% | 50  | 10.8% | 1,369 | 14.8% |
| Orange                                  | 483   | 6.3%  | 68  | 5.9%  | 21  | 4.6%  | 572   | 6.2%  |
| Inland Empire                           | 734   | 9.6%  | 58  | 5%    | 16  | 3.5%  | 808   | 8.7%  |
| San Diego – Imperial                    | 542   | 7.1%  | 145 | 12.6% | 16  | 3.5%  | 703   | 7.6%  |
| Other State or Canadian Province        | 407   | 5.3%  | 70  | 6.1%  | 30  | 6.5%  | 507   | 5.5%  |
| Other Country (Non USA/Canada)          | 222   | 2.9%  | 16  | 1.4%  | 12  | 2.6%  | 250   | 2.7%  |
| Unknown                                 | 56    | 0.7%  | 15  | 1.3%  | 8   | 1.7%  | 79    | 0.9%  |
| Time between injury and death, if known |       |       |     |       |     |       |       |       |
| 0 - Same day                            | 4,607 | 60.4% | 720 | 62.5% | 176 | 38.2% | 5,503 | 59.6% |
| 1 day                                   | 611   | 8%    | 43  | 3.7%  | 15  | 3.3%  | 669   | 7.2%  |
| 2 - 4 days                              | 500   | 6.6%  | 33  | 2.9%  | 17  | 3.7%  | 550   | 6%    |
| 5 - 89 days                             | 572   | 7.5%  | 69  | 6%    | 13  | 2.8%  | 654   | 7.1%  |
| 90 days - year                          | 24    | 0.3%  | *   |       | *   |       | 29    | 0.3%  |
| Over 1 year                             | 21    | 0.3%  | *   |       | *   |       | 22    | 0.2%  |
| Unknown                                 | 1,289 | 16.9% | 285 | 24.7% | 236 | 51.2% | 1,810 | 19.6% |

\*Values <11 not visible to protect the confidentiality of individuals summarized in the data

\*\* Values ≥11 not visible to protect the confidentiality of individuals summarized in the data
